# Supplementary material for: GRPR-Antagonists Carrying DOTAGA-Chelator via Positively Charged Linkers: Perspectives for Prostate Cancer Theranostics
Source: MDPI journal article supplement (doi:10.3390/pharmaceutics16040513), 2024-04-08
Supplement: s1 [file s1]

## Supplementary data

### GRPR-antagonists carrying DOTAGA-chelator via positively-charged linkers: Perspectives for prostate cancer theranostics

Karim Obeid , Panagiotis Kanellopoulos, Ayman Abouzayed, Adam Mattsson, Vladimir Tolmachev, Berthold A. Nock, Theodosia Maina , Anna Orlova

**Table S1. Biodistribution data (%IA/g  $\pm$  sd, n= 4) of [<sup>111</sup>In]In-AU-RM26-M1, [<sup>111</sup>In]In-AU-RM26-M2, [<sup>111</sup>In]In-AU-RM26-M3, and [<sup>111</sup>In]In-AU-RM26-M4 in PC-3 xenografted mice; at 4 h pi for [<sup>111</sup>In]In-AU-RM26-M1 and [<sup>111</sup>In]In-AU-RM26-M3 and at 4 h and 24 h pi for [<sup>111</sup>In]In-AU-RM26-M2 and [<sup>111</sup>In]In-AU-RM26-M4; results during in vivo GRPR-blockade by coinjection of excess NOTA-PEG2-RM26 at 4 h pi for [<sup>111</sup>In]In-AU-RM26-M2 and [<sup>111</sup>In]In-AU-RM26-M4 are also included (Block, values shown in italics; n= 3). Uptake in GIT and carcass is given as %IA  $\pm$  sd (n= 4).**

| Organ            | M1                           | M2                                                                          |                              | M3                             | M4                                                                              |                                |
|------------------|------------------------------|-----------------------------------------------------------------------------|------------------------------|--------------------------------|---------------------------------------------------------------------------------|--------------------------------|
|                  | 4 h                          | 4 h                                                                         | 24 h                         | 4 h                            | 4 h                                                                             | 24 h                           |
| <b>Blood</b>     | 0.04 $\pm$ 0.01              | 0.003 $\pm$ 0.002<br><i>0.06 <math>\pm</math> 0.01</i>                      | 0.01 $\pm$ 0.002             | 0.024 $\pm$ 0.002              | 0.122 $\pm$ 0.0013<br><i>0.08 <math>\pm</math> 0.01</i>                         | 0.02 $\pm$ 0.01                |
| <b>Lungs</b>     | 0.08 $\pm$ 0.05              | 0.05 $\pm$ 0.01<br><i>0.07 <math>\pm</math> 0.01</i>                        | 0.05 $\pm$ 0.02              | 0.12 $\pm$ 0.01                | 0.2 $\pm$ 0.08<br><i>0.10 <math>\pm</math> 0.0002</i>                           | 0.06 $\pm$ 0.02                |
| <b>Liver</b>     | 0.2 $\pm$ 0.1                | 0.12 $\pm$ 0.01<br><i>0.15 <math>\pm</math> 0.01</i>                        | 0.11 $\pm$ 0.01              | 0.17 $\pm$ 0.01                | 0.6 $\pm$ 0.11<br><i>0.45 <math>\pm</math> 0.11</i>                             | 0.31 $\pm$ 0.07                |
| <b>Spleen</b>    | 0.08 $\pm$ 0.02              | 0.07 $\pm$ 0.02<br><i>0.07 <math>\pm</math> 0.01</i>                        | 0.07 $\pm$ 0.01              | 0.08 $\pm$ 0.01                | 0.23 $\pm$ 0.07<br><i>0.12 <math>\pm</math> 0.004</i>                           | 0.14 $\pm$ 0.04                |
| <b>Pancreas</b>  | 0.2 $\pm$ 0.1                | 0.37 $\pm$ 0.08 <sup>e</sup><br><i>0.05 <math>\pm</math> 0.01</i>           | 0.15 $\pm$ 0.03              | 0.06 $\pm$ 0.01 <sup>f</sup>   | 3.4 $\pm$ 0.6 <sup>e,f,h</sup><br><i>0.20 <math>\pm</math> 0.05<sup>i</sup></i> | 0.36 $\pm$ 0.08 <sup>h,j</sup> |
| <b>Small Int</b> | 0.10 $\pm$ 0.04              | 0.10 $\pm$ 0.06<br><i>0.06 <math>\pm</math> 0.02</i>                        | 0.06 $\pm$ 0.03              | 0.08 $\pm$ 0.03                | 1.1 $\pm$ 0.3<br><i>0.13 <math>\pm</math> 0.04</i>                              | 0.11 $\pm$ 0.03                |
| <b>Kidneys</b>   | 6.4 $\pm$ 0.6 <sup>b,g</sup> | 5 $\pm$ 1<br><i>5.7 <math>\pm</math> 0.3</i>                                | 4.1 $\pm$ 0.4                | 3.4 $\pm$ 0.2 <sup>b,f</sup>   | 7 $\pm$ 1 <sup>g,f,h</sup><br><i>6 <math>\pm</math> 1</i>                       | 2.7 $\pm$ 0.1 <sup>h</sup>     |
| <b>Tumor</b>     | 6 $\pm$ 2 <sup>b,c</sup>     | 7 $\pm$ 2 <sup>d,e,g,j</sup><br><i>0.9 <math>\pm</math> 0.4<sup>i</sup></i> | 4.9 $\pm$ 0.7 <sup>g,k</sup> | 2.5 $\pm$ 0.6 <sup>b,d,f</sup> | 15 $\pm$ 5 <sup>c,e,f,h,j</sup><br><i>1.4 <math>\pm</math> 0.6<sup>j</sup></i>  | 7 $\pm$ 3 <sup>h,k</sup>       |
| <b>Muscle</b>    | 0.04 $\pm$ 0.02              | 0.02 $\pm$ 0.01<br><i>0.02 <math>\pm</math> 0.003</i>                       | 0.02 $\pm$ 0.01              | 0.03 $\pm$ 0.01                | 0.06 $\pm$ 0.02<br><i>0.05 <math>\pm</math> 0.02</i>                            | 0.02 $\pm$ 0.01                |
| <b>Bone</b>      | 0.05 $\pm$ 0.01              | 0.05 $\pm$ 0.03<br><i>0.05 <math>\pm</math> 0.01</i>                        | 0.04 $\pm$ 0.02              | 0.06 $\pm$ 0.01                | 0.13 $\pm$ 0.04<br><i>0.08 <math>\pm</math> 0.004</i>                           | 0.09 $\pm$ 0.02                |
| <b>GI</b>        | 0.9 $\pm$ 0.1                | 0.8 $\pm$ 0.5<br><i>0.46 <math>\pm</math> 0.03</i>                          | 0.13 $\pm$ 0.03              | 1.3 $\pm$ 0.9                  | 1.4 $\pm$ 0.3<br><i>0.5 <math>\pm</math> 0.2</i>                                | 0.15 $\pm$ 0.03                |
| <b>Carcass</b>   | 1.3 $\pm$ 0.5                | 0.8 $\pm$ 0.1 <sup>e</sup><br><i>1 <math>\pm</math> 0.5</i>                 | 0.5 $\pm$ 0.2                | 1.7 $\pm$ 0.3                  | 3 $\pm$ 1.5 <sup>e,h</sup><br><i>1.6 <math>\pm</math> 0.3</i>                   | 0.8 $\pm$ 0.2 <sup>h</sup>     |

<sup>a-k</sup> Two-way Anova with Tuckey's post hoc analysis ( $p < 0.05$ ): <sup>a</sup> Significant difference between [<sup>111</sup>In]In-AU-RM26-M1 and [<sup>111</sup>In]In-AU-RM26-M2; <sup>b</sup> Significant difference between [<sup>111</sup>In]In-AU-RM26-M1 and [<sup>111</sup>In]In-AU-RM26-M3; <sup>c</sup> Significant difference between [<sup>111</sup>In]In-AU-RM26-M1 and [<sup>111</sup>In]In-AU-RM26-M4; <sup>d</sup> Significant difference between [<sup>111</sup>In]In-AU-RM26-M2 and [<sup>111</sup>In]In-AU-RM26-M3; <sup>e</sup> Significant difference between [<sup>111</sup>In]In-AU-RM26-M2 and [<sup>111</sup>In]In-AU-RM26-M4 at 4 h pi; <sup>f</sup> Significant difference between [<sup>111</sup>In]In-AU-RM26-M3 and [<sup>111</sup>In]In-AU-RM26-M4; <sup>g</sup> Significant difference between [<sup>111</sup>In]In-AU-RM26-M2 at 4 and 24 h pi; <sup>h</sup> Significant difference between [<sup>111</sup>In]In-AU-RM26-M4 at 4 and 24 h pi; <sup>i</sup> Significant difference between [<sup>111</sup>In]In-AU-RM26-M2 4 h and block; <sup>j</sup> Significant difference between [<sup>111</sup>In]In-AU-RM26-M4 4 h and block; <sup>k</sup> Significant difference between [<sup>111</sup>In]In-AU-RM26-M3 and [<sup>111</sup>In]In-AU-RM26-M4 at 24 h pi; unless clearly stated, differences refer to values at 4 h pi.

**Table S2.** Tumor-to-organ ratios of [<sup>111</sup>In]In-AU-RM26-M1 (M1), [<sup>111</sup>In]In-AU-RM26-M2 (M2), [<sup>111</sup>In]In-AU-RM26-M3 (M3) and [<sup>111</sup>In]In-AU-RM26-M4 (M4) in PC-3 tumor-bearing mice; for [<sup>111</sup>In]In-AU-RM26-M1 and [<sup>111</sup>In]In-AU-RM26-M3 at 4 h pi and for [<sup>111</sup>In]In-AU-RM26-M2 and [<sup>111</sup>In]In-AU-RM26-M4 at 4 h and 24 h pi.

| Organ            | M1                       | M2                           |                        | M3                       | M4                       |                        |
|------------------|--------------------------|------------------------------|------------------------|--------------------------|--------------------------|------------------------|
|                  | 4 h                      | 4 h                          | 24 h                   | 4 h                      | 4 h                      | 24 h                   |
| <b>Blood</b>     | 133 ± 26                 | 265 ± 99 <sup>c,d,e</sup>    | 471 ± 60 <sup>c</sup>  | 104 <sup>d</sup> ± 29    | 123 ± 43 <sup>e,g</sup>  | 369 ± 228 <sup>g</sup> |
| <b>Lungs</b>     | 81 ± 25                  | 173 ± 50                     | 101 ± 37               | 33 ± 22                  | 90 ± 59                  | 120 ± 61               |
| <b>Liver</b>     | 39 ± 5                   | 60 ± 16                      | 43 ± 3                 | 15 ± 4.5                 | 25 ± 11                  | 23 ± 9                 |
| <b>Spleen</b>    | 72 ± 9.5                 | 109 ± 15                     | 74 ± 20                | 31 ± 9                   | 71 ± 37                  | 54 ± 30                |
| <b>Pancreas</b>  | 27 ± 4                   | 19 ± 2                       | 32 ± 3                 | 45 ± 15                  | 4 ± 1                    | 20 ± 5                 |
| <b>Small Int</b> | 57 ± 7                   | 70 ± 42                      | 87 ± 33                | 35 ± 15                  | 15 ± 7                   | 67 ± 35                |
| <b>Kidneys</b>   | 0.9 ± 0.2                | 1.6 ± 0.7                    | 1.20 ± 0.15            | 0.7 ± 0.2                | 2.3 ± 0.9                | 2.6 ± 0.9              |
| <b>Muscle</b>    | 234 ± 154 <sup>a,b</sup> | 478 ± 298 <sup>a,c,d,e</sup> | 313 ± 127 <sup>c</sup> | 75 ± 18 <sup>b,d,f</sup> | 307 ± 168 <sup>e,f</sup> | 347 ± 176              |
| <b>Bone</b>      | 117 ± 16                 | 184 ± 156                    | 157 ± 91               | 39 ± 8                   | 119 ± 40                 | 79 ± 25                |

Two-way Anova with Tuckey's post hoc analysis ( $p < 0.05$ ): <sup>a</sup> Significant difference between [<sup>111</sup>In]In-AU-RM26-M1 and [<sup>111</sup>In]In-AU-RM26-M2 (4 h pi); <sup>b</sup> Significant difference between [<sup>111</sup>In]In-AU-RM26-M1 and [<sup>111</sup>In]In-AU-RM26-M3 (4 h pi); <sup>c</sup> Significant difference between [<sup>111</sup>In]In-AU-RM26-M2 4 h and 24 h pi; <sup>d</sup> Significant difference between [<sup>111</sup>In]In-AU-RM26-M2 (4 h pi) and [<sup>111</sup>In]In-AU-RM26-M3 (4 h pi); <sup>e</sup> Significant difference between [<sup>111</sup>In]In-AU-RM26-M2 (4 h pi) and [<sup>111</sup>In]In-AU-RM26-M4 (4 h pi); <sup>f</sup> Significant difference between [<sup>111</sup>In]In-AU-RM26-M3 and [<sup>111</sup>In]In-AU-RM26-M4 (4 h pi); <sup>g</sup> Significant difference between [<sup>111</sup>In]In-AU-RM26-M4 4 h pi and 24 h pi.
